# Supplementary material for: Emotional Eating, Health Behaviours, and Obesity in Children: A 12-Country Cross-Sectional Study
Source: MDPI journal article supplement (doi:10.3390/nu11020351), 2019-02-07
Supplement: s1 [file s1]

# Supplementary Materials: Emotional eating, health behaviours, and obesity in children: a 12-country cross-sectional study

Elli Jalo, Hanna Konttinen, Henna Vepsäläinen, Jean-Philippe Chaput, Gang Hu, Carol Maher, José Maia, Olga L. Sarmiento, Martyn Standage, Catrine Tudor-Locke, Peter T. Katzmarzyk, and Mikael Fogelholm

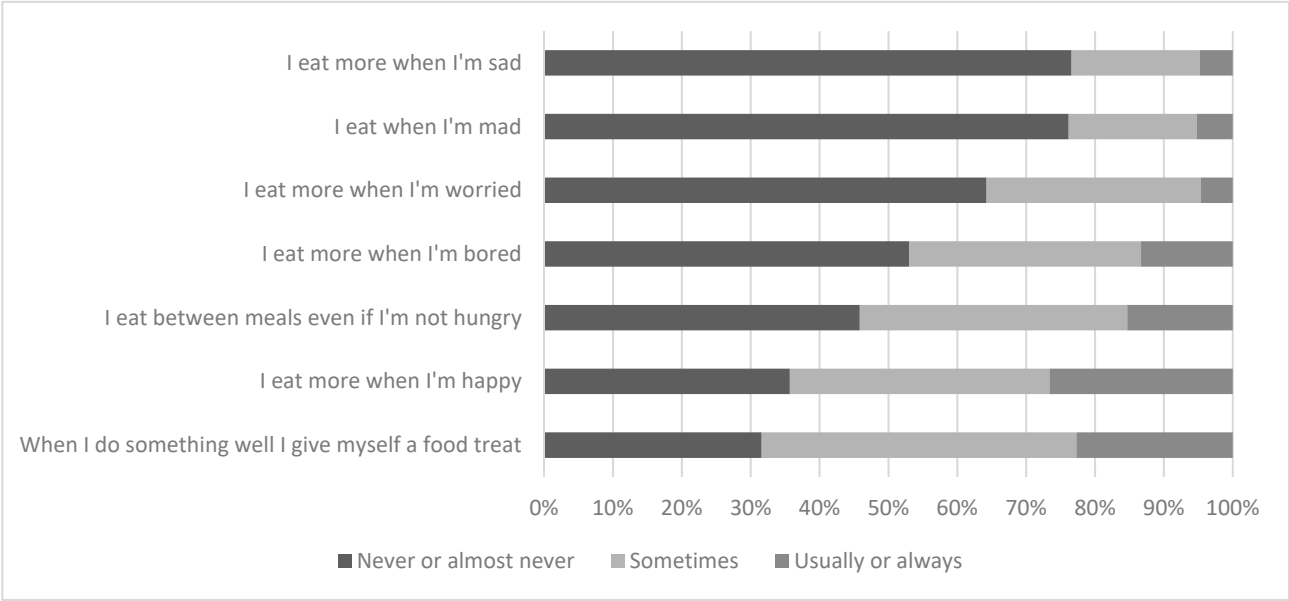

**Figure S1.** Item level frequencies of the original Emotion-Induced Eating Scale,  $n = 5426$ .
